# Supplementary material
Source: Springer Nature journal article supplement (https://www.springermedizin.de/resource/supplementary/13069_2013_130_MOESM5_ESM.pdf/9659844)

### Strict uninfl CD myofibroblasts

### Non-strict uninfl CD myofibroblasts

### HC myofibroblasts

**A**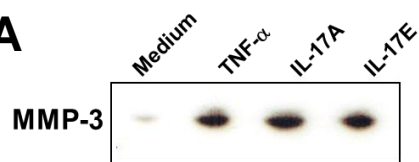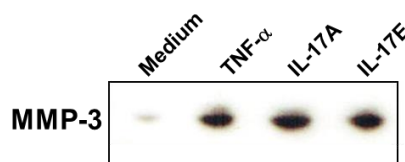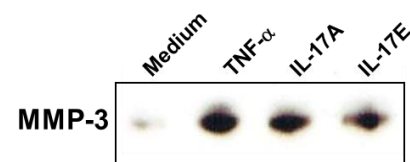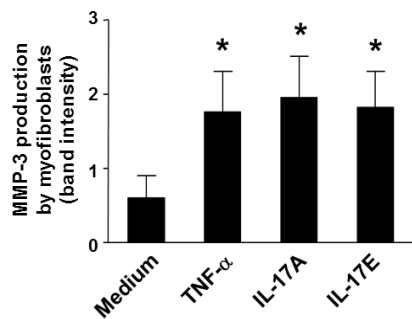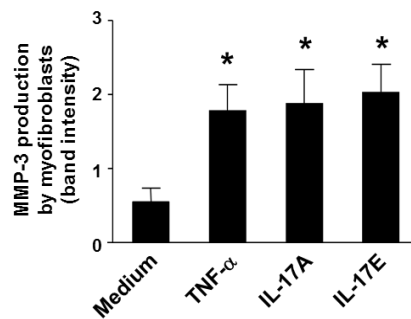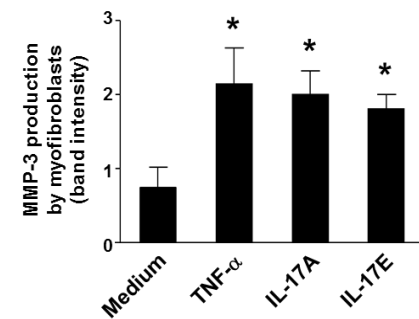**B**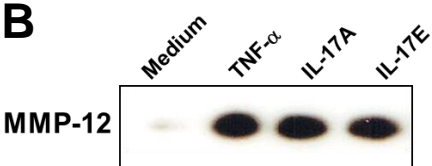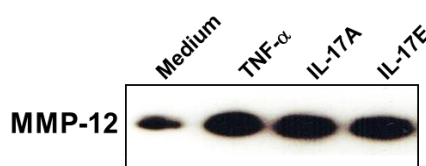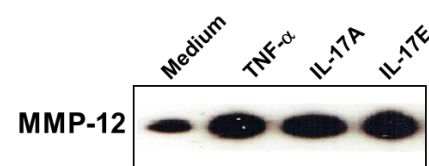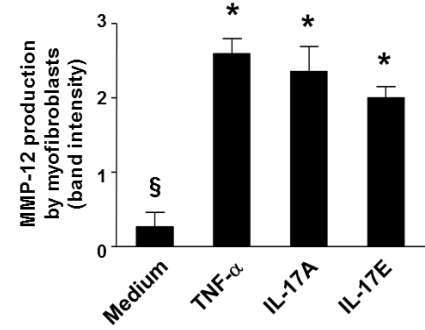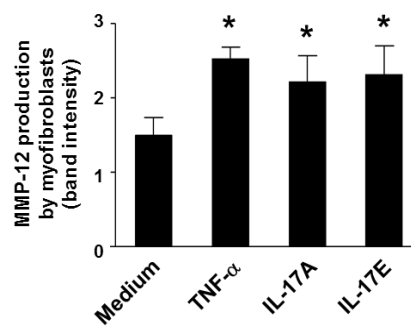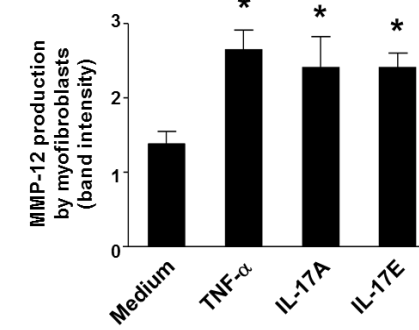**C**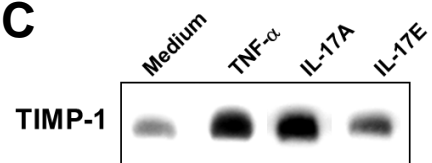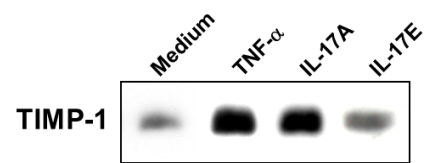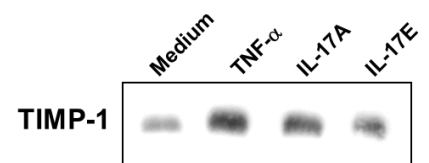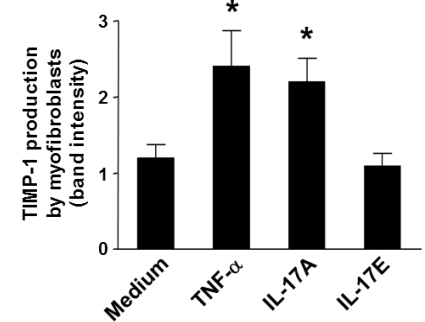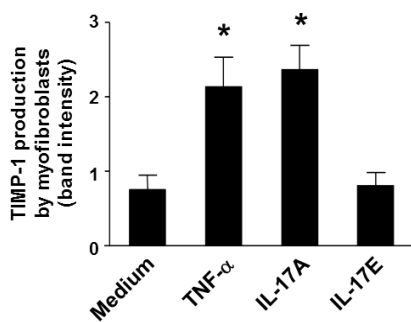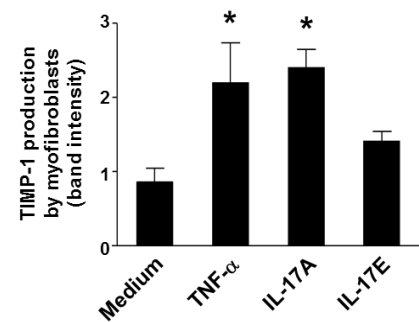

Supplement: MOESM5 [file 9659844]
